# Supplementary material
Source: PubMed Central journal article supplement (PMC2851901)
Supplement: 1001225107_pnas.201001225SI.pdf [file 1001225107_pnas.201001225SI.pdf]

# Supporting Information

Smith et al. 10.1073/pnas.1001225107

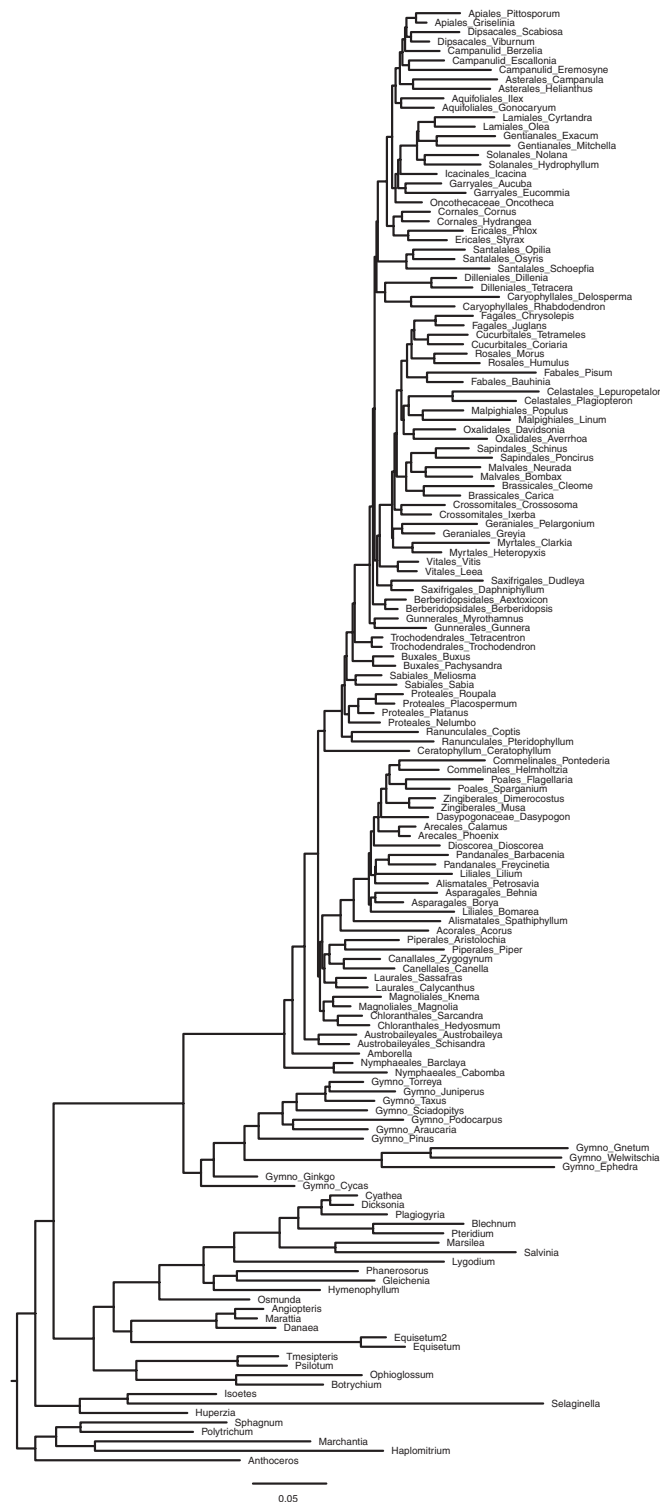

**Fig. S1.** The maximum-likelihood gene tree for three genes (*18S*, *atpB*, and *rbcL*) with identical topology to the tree shown in Fig 1A. Note that studies focused on the root of the land plants, including outgroups, place the root along the liverwort branch (Marchantia+Haplomitrium; “bryophytes” paraphyletic).







**Table S1. List of taxa included in the phylogenetic analysis**

| Taxon                          | 18S      | <i>atpB</i> | <i>rbcl</i> |
|--------------------------------|----------|-------------|-------------|
| <i>Bryophyta</i>               |          |             |             |
| Anthoceros                     | X80984   | D43695      | D43695      |
| Haplomitrium                   | U18504   | AF313555    | U87071      |
| Marchantia                     | X75521   | X04465      | X04465      |
| Polytrichum                    | X80982   | AF313556    | U87087      |
| Sphagnum                       | Y11370   | AF313557    | L13485      |
| <i>Lycopodiophyta</i>          |          |             |             |
| Huperzia                       | AF313567 | U93819      | Y07934      |
| Isoetes                        | AF313577 | AF313544    | L11054      |
| Selaginella                    | AF313575 | AF313554    | AJ010854    |
| <i>Monilophyta</i>             |          |             |             |
| Angiopteris                    | D85301   | AF313546    | X58429      |
| Blechnum                       | AF313570 | U93838      | U05909      |
| Botrychium                     | AF313566 | U93825      | L13474      |
| Cyathea                        | AF313574 | AF313553    | AF313585    |
| Danaea                         | AF313561 | AF313543    | AF313578    |
| Dicksonia                      | U18624   | U93829      | U05919      |
| Equisetum                      | AF313576 | AF313541    | AF313579    |
| Equisetum2                     | AF313562 | AF313542    | AF313580    |
| Gleichenia                     | AF313572 | AF313550    | AF313584    |
| Hymenophyllum                  | AF313559 | AF313538    | AF275645    |
| Lygodium                       | AB001538 | AF313549    | L13479      |
| Marattia                       | AF313564 | AF313540    | AF313581    |
| Marsilea                       | AF313573 | AF313551    | L13480      |
| Ophioglossum                   | AF313565 | U93826      | AF313582    |
| Osmunda                        | AF313560 | AF313539    | D14882      |
| Phanerosorus                   | AF313571 | AF313548    | AF313583    |
| Plagiogyria                    | AF313568 | AF313547    | U05643      |
| Psilotum                       | X81963   | U93822      | L11059      |
| Pteridium                      | AF313569 | U93835      | U05939      |
| Salvinia                       | X90413   | AF313552    | U05649      |
| Tmesipteris                    | AF313563 | AF313545    | U30836      |
| <i>Acrogymnospermae</i>        |          |             |             |
| Gymno_Araucaria                | D38240   | EF490503    | EF490510    |
| Gymno_Cycas                    | D85297   | AF313558    | L12674      |
| Gymno_Ephedra                  | D38242   | AF239779    | D10732      |
| Gymno_Ginkgo                   | D16448   | AJ235481    | D10733      |
| Gymno_Gnetum                   | U42416   | AF187060    | U72819      |
| Gymno_Juniperus                | D38243   | AY664834    | AY988260    |
| Gymno_Pinus                    | D38245   | D17510      | X58134      |
| Gymno_Podocarpus               | D38473   | AF469661    | AF462414    |
| Gymno_Sciadopitys              | D85292   | AF239792    | L25753      |
| Gymno_Taxus                    | EF017310 | AJ235619    | AF456388    |
| Gymno_Torreyia                 | D38249   | AY664832    | AY664858    |
| Gymno_Welwitschia              | AF207059 | AJ235645    | AY296573    |
| <i>Angiospermae</i>            |          |             |             |
| Acorales_Acorus                | AF197584 | AJ235381    | AY298815    |
| Alismatales_Petrosavia         | AF206987 | AF209649    | AF206806    |
| Alismatales_Spathiphyllum      | AF207023 | AJ235606    | AJ235807    |
| Amborella                      | U42497   | D89556      | L12628      |
| Apiales_Griselinia             | AF206922 | AF209595    | L11225      |
| Apiales_Pittosporum            | L28142   | AJ235561    | L11202      |
| Aquifoliales_Gonocaryum        | AF206919 | AJ235483    | AJ235779    |
| Aquifoliales_Ilex              | AF206938 | AJ235502    | X98735      |
| Arecales_Calamus               | AF168828 | AF233081    | M81810      |
| Arecales_Phoenix               | AF206991 | AF209652    | M81814      |
| Asparagales_Behnia             | AF206864 | AF209542    | AF206740    |
| Asparagales_Borya              | AF206872 | AF209543    | AF206741    |
| Asterales_Campanula            | U42510   | AJ235423    | DQ356118    |
| Asterales_Helianthus           | AF107577 | AJ236205    | L13929      |
| Austrobaileyales_Austrobaileya | U42503   | AJ235403    | L12632      |
| Austrobaileyales_Schisandra    | L75842   | AJ235599    | L12665      |
| Berberidopsidales_Aextoxicon   | AF206839 | AJ235384    | X83986      |

Table S1. Cont.

| Taxon                           | 18S      | <i>atpB</i> | <i>rbcl</i> |
|---------------------------------|----------|-------------|-------------|
| Berberidopsidales_Berberidopsis | AF206866 | AJ235409    | AJ235773    |
| Brassicales_Carica              | U42514   | AF035901    | M95671      |
| Brassicales_Cleome              | U42511   | AF209565    | M95755      |
| Buxales_Buxus                   | X16599   | AF092110    | DQ182333    |
| Buxales_Pachysandra             | AF094533 | AF092111    | AF093718    |
| Campanulid_Berzelia             | U42508   | AF095731    | L14391      |
| Campanulid_Eremosyne            | U42807   | AJ236215    | L47969      |
| Campanulid_Escallonia           | U42544   | AJ235467    | L11183      |
| Canellales_Canella              | AF206879 | AJ235424    | AJ131928    |
| Canellales_Zygogynum            | AF206865 | AJ235408    | L12633      |
| Caryophyllales_Delosperma       | AF206899 | AJ235452    | AJ235778    |
| Caryophyllales_Rhabdodendron    | AF207007 | AJ235578    | Z97649      |
| Celastales_Lepuropetalon        | L28141   | AF209616    | L11192      |
| Celastales_Plagiopteron         | AF206993 | AJ235562    | AJ235787    |
| Ceratophyllum_Ceratophyllum     | D85300   | D89552      | M77030      |
| Chloranthales_Hedyosmum         | AF206925 | AJ235490    | L12649      |
| Chloranthales_Sarcandra         | AF207012 | AJ235593    | L12663      |
| Commelinales_Helmholtzia        | U42074   | AF168922    | AY465691    |
| Commelinales_Pontederia         | AF168871 | AF209657    | L20128      |
| Cornales_Cornus                 | X16602   | AJ235444    | L11216      |
| Cornales_Hydrangea              | U42781   | AJ235497    | L11187      |
| Crossomitaes_Crossosoma         | U42529   | AF209571    | L11179      |
| Crossomitaes_Ixerba             | AF084476 | AF209606    | AF084475    |
| Cucurbitales_Coriaria           | AF206891 | AJ235443    | L01897      |
| Cucurbitales_Tetrameles         | U41502   | AF209689    | AF206828    |
| Dasypogonaceae_Dasypogon        | AJ417898 | AF168907    | AF206758    |
| Dilleniales_Dillenia            | AY788163 | AY788268    | L01903      |
| Dilleniales_Tetracera           | AJ235982 | AJ235622    | AJ235796    |
| Dioscorea_Dioscorea             | AF069203 | AJ235456    | AY904802    |
| Dipsacales_Scabiosa             | AJ236006 | AJ236207    | AF156734    |
| Dipsacales_Viburnum             | AJ236007 | AJ235640    | AJ420869    |
| Ericales_Phlox                  | AJ235996 | AJ236221    | AF206809    |
| Ericales_Styrax                 | U43296   | AJ235615    | L12623      |
| Fabales_Bauhinia                | U42537   | AF209540    | AM234266    |
| Fabales_Pisum                   | U43011   | X03852      | X03853      |
| Fagales_Chrysolepis             | AF206886 | AF209563    | AF206750    |
| Fagales_Juglans                 | AF206943 | AF209609    | AF206785    |
| Garryales_Aucuba                | U42522   | AJ235402    | L11210      |
| Garryales_Eucommia              | L54066   | AJ235469    | L01917      |
| Gentianales_Exacum              | AJ236023 | AJ236195    | L11684      |
| Gentianales_Mitchella           | U42802   | AF209630    | Z68805      |
| Geraniales_Greyia               | U43151   | AF209594    | L11185      |
| Geraniales_Pelargonium          | AF206982 | AF035911    | L01919      |
| Gunnerales_Gunnera              | U43787   | EU002162    | EU002279    |
| Gunnerales_Myrothamnus          | AF094555 | AF093386    | AF060707    |
| Icacinales_Icacina              | AF206935 | AF209603    | AF206780    |
| Lamiales_Cyrtandra              | AJ236053 | AJ236172    | AF206757    |
| Lamiales_Olea                   | L49289   | AJ236163    | AJ001766    |
| Laurales_Calycanthus            | U38318   | AJ235422    | L14291      |
| Laurales_Sassafras              | AF233091 | AF209668    | AF206790    |
| Liliales_Bomarea                | AF206871 | AJ235413    | Z77255      |
| Liliales_Lilium                 | AF206952 | AF209618    | Z77295      |
| Magnoliales_Knema               | AF206946 | AF209611    | L12653      |
| Magnoliales_Magnolia            | AF206956 | AJ235526    | AY008934    |
| Malpighiales_Linum              | L24401   | AJ235521    | Z75681      |
| Malpighiales_Populus            | AF206999 | AF209658    | AF206812    |
| Malvales_Bombax                 | U42507   | AJ233051    | AF022118    |
| Malvales_Neurada                | AF206970 | AF209637    | U06814      |
| Myrtales_Clarkia                | U67930   | AF209564    | L10896      |
| Myrtales_Heteropyxis            | AF206927 | AF209597    | AF206775    |
| Nymphaeales_Barclaya            | AF096692 | AF209536    | M77028      |
| Nymphaeales_Cabomba             | AF206878 | AF187058    | M77027      |

**Table S1. Cont.**

| Taxon                         | 18S      | <i>atpB</i> | <i>rbcl</i> |
|-------------------------------|----------|-------------|-------------|
| Oncothecaceae_Oncotheca       | AF206976 | AJ235549    | AJ131950    |
| Oxalidales_Averrhoa           | AF206859 | AJ235404    | L14692      |
| Oxalidales_Davidsonia         | AF206897 | AF209574    | AF206759    |
| Pandanales_Barbacenia         | AF206861 | AJ235406    | AJ131946    |
| Pandanales_Freycinetia        | AF206915 | AF209590    | AF206770    |
| Piperales_Aristolochia        | AF206855 | AJ235399    | L12630      |
| Piperales_Piper               | AF206992 | AJ235560    | EF450311    |
| Poales_Flagellaria            | AF168845 | AF209589    | AF206769    |
| Poales_Sparganium             | L24419   | AF209678    | M91633      |
| Proteales_Nelumbo             | L75835   | AF093387    | M77032      |
| Proteales_Placospermum        | L75837   | AF060391    | AF093729    |
| Proteales_Platanus            | U42794   | U86386      | AY858644    |
| Proteales_Roupala             | AF094559 | AF060416    | AF093728    |
| Ranunculales_Coptis           | L75838   | AF093393    | AF093730    |
| Ranunculales_Pteridophyllum   | AF094560 | U86400      | U86631      |
| Rosales_Humulus               | AF206931 | AF209599    | U02729      |
| Rosales_Morus                 | L24398   | AJ235536    | L01933      |
| Sabiales_Meliosma             | AF206961 | AF209626    | AF206793    |
| Sabiales_Sabia                | L75840   | AF093395    | AM183414    |
| Santalales_Opilia             | U42790   | AJ235550    | AJ131773    |
| Santalales_Osyris             | L24409   | AF209641    | L11196      |
| Santalales_Schoepfia          | AF207017 | AF209671    | L11205      |
| Sapindales_Poncirus           | AF206997 | AJ238409    | AJ235806    |
| Sapindales_Schinus            | AF207015 | AF035914    | U39270      |
| Saxifrigales_Daphniphyllum    | U42531   | AF092118    | L01901      |
| Saxifrigales_Dudleya          | U42526   | AJ235461    | L11182      |
| Solanales_Hydrophyllum        | AJ236019 | AJ235498    | L01927      |
| Solanales_Nolana              | AJ236017 | AF209638    | U08616      |
| Trochodendrales_Tetracentron  | U42814   | AF093422    | L12668      |
| Trochodendrales_Trochodendron | AF094565 | AF093423    | L01958      |
| Vitales_Leea                  | AF206951 | AJ235520    | AJ235783    |
| Vitales_Vitis                 | AF207053 | AJ235643    | L01960      |
| Zingiberales_Dimerocostus     | AF168839 | AF168909    | AF243838    |
| Zingiberales_Musa             | U42083   | AF168931    | L05455      |

List of taxa included in the phylogenetic analysis with GenBank accession numbers, which were compiled from Soltis et al. (1) and Pyer et al. (2). In many cases, all three genes were not sampled for a particular taxon, and so sequences from closely related species of the same genus were used. The taxon labels are consistent with the labels shown in [Figs. S1, S2, S3, and S4](#).

1. Soltis PS, Soltis DE, Chase MW (1999) Angiosperm phylogeny inferred from multiple genes as a tool for comparative biology. *Nature* 402:402–404.
2. Pryer KM, et al. (2001) Horsetails and ferns are a monophyletic group and the closest living relatives to seed plants. *Nature* 409:618–622.



**Table S2. Fossil information, minimum age estimates, and associated lognormal prior-probability distribution parameters for the clades calibrated in our divergence-time analysis of land plants**

|    | Clade            | Fossil                                                    | Fossil type   | Ref.  | Stem/Crown | Min. age | Mean (SD) |
|----|------------------|-----------------------------------------------------------|---------------|-------|------------|----------|-----------|
| 1  | Tracheophyta     | <i>Leclerquia</i> sp.                                     | Plant         | 1     | Stem       | 377.4    | 3.5 (0.5) |
| 2  | Marattiales      | <i>Marattia</i> , <i>Angiopteris</i>                      | Spore         | 2,3   | Crown      | 166.1    | 1.5 (0.5) |
| 3  | Cyatheales       | <i>Cniopteris</i> , <i>Kylikipteris</i> , <i>Eboracia</i> | Plant         | 2     | Crown      | 166.1    | 1.6 (0.5) |
| 4  | Euphyllophyta    | Unnamed                                                   | Seeds         | 4     | Crown      | 365      | 3.5 (0.5) |
| 5  | Acrogymnospermae | <i>Emporia lockardii</i>                                  | Cones         | 5,6   | Crown      | 290      | 2.4 (0.5) |
| 6  | Nymphaeales      | <i>Scutifolium jordanicum</i>                             | Leaves        | 7     | Crown      | 105.0    | 1.5 (0.5) |
| 7  | Laurales         | Unnamed                                                   | Flower        | 8     | Crown      | 108.8    | 2.1 (0.5) |
| 8  | Magnoliales      | Unnamed                                                   | Flower        | 8     | Stem       | 108.8    | 1.5 (0.5) |
| 9  | Chloranthales    | <i>Hedyosmum</i> sp.                                      | Flower        | 9     | Crown      | 121.0    | 1.5 (0.5) |
| 10 | Canellales       | Unnamed                                                   | Pollen        | 10    | Stem       | 122.5    | 2.0 (0.5) |
| 11 | Pandanales       | <i>Pandanus</i> sp.                                       | Pollen        | 11,12 | Crown      | 65.0     | 1.8 (0.5) |
| 12 | Arecales         | <i>Dicolpopollis malesianus</i>                           | Pollen        | 13    | Crown      | 65.0     | 1.8 (0.5) |
| 13 | Poales           | <i>Restio</i> sp.                                         | Pollen        | 12,14 | Crown      | 68.1     | 1.8 (0.5) |
| 14 | Zingiberales     | <i>Spirematospermum chandlerae</i>                        | Seeds         | 15    | Crown      | 83.5     | 1.8 (0.5) |
| 15 | Proteales        | <i>Platanocarpus brookensis</i>                           | Flower        | 16    | Crown      | 108.8    | 1.5 (0.5) |
| 16 | Buxales          | Unnamed                                                   | Fruit, flower | 17    | Stem       | 112.0    | 1.5 (0.5) |
| 17 | Gunnerales       | <i>Retitricolpites microreticulatus</i>                   | Pollen        | 12    | Crown      | 88.2     | 1.5 (0.5) |
| 18 | Saxifragales     | <i>Divisestylus</i> sp.                                   | Fruit, flower | 18    | Crown      | 89.3     | 1.5 (0.5) |
| 19 | Caryophyllales   | Unnamed                                                   | Seeds         | 19    | Crown      | 83.5     | 1.5 (0.5) |
| 20 | Dilleniales      | <i>Dillenites</i> sp.                                     | Seeds         | 19    | Crown      | 51.9     | 1.5 (0.5) |
| 21 | Santanales       | Unnamed                                                   | Seeds         | 19    | Crown      | 51.9     | 1.5 (0.5) |
| 22 | Ericales         | Unnamed                                                   | Flower        | 20    | Crown      | 91.2     | 1.5 (0.5) |
| 23 | Cornales         | Unnamed                                                   | Flower        | 21    | Crown      | 85.8     | 1.5 (0.5) |
| 24 | Lamiales         | <i>Fraxinus wilcoxiana</i>                                | Fruit         | 22    | Crown      | 44.3     | 1.5 (0.5) |
| 25 | Solanales        | <i>Cantisolanum daturoides</i>                            | Fruit         | 19    | Crown      | 44.3     | 1.5 (0.5) |
| 26 | Aquifoliales     | <i>Ilexpollenites</i> sp.                                 | Pollen        | 12,23 | Crown      | 85.0     | 1.5 (0.5) |
| 27 | Vitales          | Unnamed                                                   | Seeds         | 19    | Crown      | 57.9     | 1.5 (0.5) |
| 28 | Myrtales         | <i>Esqueiria futabensis</i>                               | Flower        | 24    | Crown      | 88.2     | 1.5 (0.5) |
| 29 | Sapindales       | Unnamed                                                   | Fruit         | 25    | Crown      | 65.0     | 1.5 (0.5) |
| 30 | Malvales         | Unnamed                                                   | Pollen        | 26    | Crown      | 69.7     | 1.5 (0.5) |
| 31 | Fabales          | Unnamed                                                   | Fruit         | 27    | Crown      | 59.9     | 1.5 (0.5) |
| 32 | Fagales          | <i>Tenerina</i> sp.                                       | Pollen        | 28    | Stem       | 96.0     | 1.5 (0.5) |

- Grierson JD, Bonamo PM (1979) *Leclerquia complexa*: Earliest ligulate lycopod (Middle Devonian). *Am J Bot* 66:474–476.
- Harris TM (1961) *The Yorkshire Jurassic Flora: I. ThallopHYta-Pteridophyta* (British Museum Natural History, London).
- Hill CR (1987) Jurassic *Angiopteris* (Marattiales) from North Yorkshire. *Rev Palaeobot Palynol* 51:65–93.
- Rothwell GW, Scheckler SE (1998) *Origin and Evolution of Gymnosperms* (Columbia University Press, New York), pp 85–134.
- Mapes G, Rothwell GW (1984) Permineralized ovulate cones of *Lebachia* from Late Paleozoic Hamilton Quarry area in southeastern Kansas. *Palaeontology* 27:69–94.
- Mapes G, Rothwell GW (1991) Structure and relationship of primitive conifers. *Neues Jahrbuch für Geologie und Palaeontologie* 183:269–287.
- Taylor DW, Brenner GJ, Basha SH (2008) *Scutifolium jordanicum* gen. et. sp. nov. (Cabombaceae), an aquatic fossil plant from the lower Cretaceous of Jordan, and the relationships of related leaf fossils to living genera. *Am J Bot* 95:340–352.
- Crane PR, Friis EM, Pedersen KR (1994) Palaeobotanical evidence on the early radiation of magnoliid angiosperms. *Plant Syst Evol* 8:51–72.
- Friis EM, Pedersen KR, Crane PR (1999) Early angiosperm diversification: the diversity of pollen associated with angiosperm reproductive structures in early Cretaceous floras from Portugal. *Ann Miss Bot Gard* 86:259–296.
- Doyle JA, Hotton CL, Ward JV (1990) Early Cretaceous tetrads, zonosulcate pollen, and Winteraceae. II. Cladistic analysis and implications. *Am J Bot* 77:1558–1568.
- Jarzen DM (1978) The terrestrial palynoflora from the Cretaceous-Tertiary transition, Alabama, U.S.A. *Pollen and Spores* 20:535–553.
- Muller J (1981) Fossil pollen records of extant angiosperms. *Bot Rev* 47:1–142.
- Pan AD, Jacobs BF, Dransfield J, Baker WJ (2006) The fossil history of palms (Arecaceae) in Africa and new records from the Late Oligocene (28–27 Mya) of north-western Ethiopia. *Bot J Linn Soc* 151:69–81.
- Jarzen DM (1978) Some Maastrichtian palynomorphs and their phytogeographical and palaeoecological implications. *Palynology* 2:29–38.
- Friis EM (1988) *Spirematospermum chandlerae* sp. Nov., an extinct Zingiberaceae from the North American Cretaceous. *Tert Res* 9:7–12.
- Crane PR, Herendeen PS (1996) Cretaceous floras containing angiosperm flowers and fruits from eastern North America. *Rev Palaeobot Palynol* 90:319–337.
- Anderson CL, Bremer K, Friis EM (2005) Dating phylogenetically basal eudicots using *rbcL* sequences and multiple fossil reference points. *Am J Bot* 92:1737–1748.
- Hermesen EJ, Gandolfo MA, Nixon KC, Crepet WL (2003) *Divisestylus* gen. Nov. (aff. Iteaceae), a fossil saxifrage from the late Cretaceous of New Jersey, USA. *Am J Bot* 90:1373–1388.
- Collinson ME, Boulter MC, Holmes PL (1993) in *The Fossil Record* (Chapman and Hall, London), Vol 2, pp 809–841.
- Nixon KC, Crepet WL (1993) Late Cretaceous fossil flowers of ericalean affinity. *Am J Bot* 80:616–623.
- Magallon S (1997) Affinity within Hydrangeaceae of a structurally preserved Late Cretaceous flower (Coniacian-Santonian of Georgia, U.S.A.). *Am J Bot* 84 (Suppl.):215.
- Call VB, Dilcher DL (1992) Investigations of angiosperms from the Eocene of southwestern North America: samaras of *Fraxinus wilcoxiana* berry. *Rev Palaeobot Palynol* 74:249–266.
- Martin HA (1977) The history of Ilex (Aquifoliaceae) with special reference to Australia: evidence from pollen. *Aust J Bot* 25:655–673.
- Takahashi M, Crane PR, Ando H (1999) *Esqueiria futabensis* sp. nov., a new angiosperm flower from the Upper Cretaceous (lower Coniacian) of northeastern Honshu, Japan. *Paleontol Res* 3:81–87.
- Knobloch ED, Mai DH (1986) Monograph of the fruits and seeds in the Cretaceous of Central Europe. *Rozprawy Ústředního Ústavu Geologického*, 47:1–219 (in German).
- Wolfe JA (1976) Stratigraphic distribution of some pollen types from the Campanian and lower Maastrichtian rocks (Upper Cretaceous) of the middle Atlantic states. *U.S. Geological Survey Professional Paper* 997:1–108.
- Herendeen PS, Crane PR (1992) *Advances in Legume Systematics. Pt. 4. The Fossil Record* (Royal Botanic Gardens, Kew, United Kingdom), pp 57–68.
- Friis EM, Pedersen KR, Schonenberger J (2006) Normapolles plants: a prominent component of the Cretaceous rosid diversification. *Plant Syst Evol* 260:107–140.



**Table S3. Divergence-time estimates (in Myr) for major clades of land plants as estimated partitioning for codon position**

| Clade                   | Coding analysis |
|-------------------------|-----------------|
| Land plants             | 442 (401–514)   |
| <i>Tracheophyta</i>     | 411 (392–442)   |
| <i>Spermatophyta</i>    | 331 (306–363)   |
| <i>Acrogymnospermae</i> | 301 (294–313)   |
| <i>Gnetophyta</i>       | 157 (103–218)   |
| <i>Angiospermae</i>     | 231 (189–281)   |
| <i>Magnoliidae</i>      | 166 (147–190)   |
| <i>Monocotyledoneae</i> | 145 (127–168)   |
| <i>Eudicotyledoneae</i> | 155 (137–176)   |

Dates within parentheses denote the 95% HPD.
